# Supplementary material for: The Influence of Selected Meteorological Factors on the Prevalence and Course of Stroke
Source: MDPI journal article supplement (doi:10.3390/medicina57111216), 2021-11-08
Supplement: s1 [file s1]

# Supplement

**Table S1.** Meteorological parameters and the neurological status of patients as per the NIHSS on the day of onset.

| Parameter                                                   | NIHSS (1)<br>0-4<br>N=262                     | NIHSS (2)<br>5-12<br>N=97                     | NIHSS (3)<br>13-42<br>N=43                    | P 1-2 | P 1-3 | P 2-3 | p     |
|-------------------------------------------------------------|-----------------------------------------------|-----------------------------------------------|-----------------------------------------------|-------|-------|-------|-------|
| Mean temperature on the first day of stroke [°C]            | 8.85 ± 8.10<br>Median 7.3<br>[-7.2-27]        | 9.58 ± 7.76<br>Median 8.8<br>[-7.2-27]        | 7.74 ± 7.12<br>Median 5.6<br>[-3-23.8]        | 0.419 | 0.442 | 0.205 | 0.587 |
| Mean temperature on the day preceding stroke [°C]           | 8.98 ± 7.83<br>Median 7.45<br>[-7.2-27]       | 9.47 ± 7.27<br>Median 9.3<br>[-4.5-26]        | 8.13 ± 7.25<br>Median 6.4<br>[-3.1-23.8]      | 0.631 | 0.586 | 0.368 | 0.103 |
| Mean atmospheric pressure on the first day of stroke [hPa]  | 984.6 ± 8.6<br>Median 984.9<br>[946.9-1004.7] | 985.6 ± 8.4<br>Median 986.5<br>[946.9-1000.2] | 986.3 ± 7.9<br>Median 985.7<br>[969.5-1001.6] | 0.353 | 0.220 | 0.611 | 0.979 |
| Mean atmospheric pressure on the day preceding stroke [hPa] | 984.8 ± 7.7<br>Median 984.6<br>[958.4-1004.7] | 985.9 ± 7.7<br>Median 986<br>[963.5-1004.4]   | 985.7 ± 8.1<br>Median 984.7<br>[963.5-1001.8] | 0.261 | 0.503 | 0.903 | 0.973 |
| Mean relative humidity on the first day of stroke [%]       | 73.6 ± 13.2<br>Median 74.45<br>[43.2-96.4]    | 74.1 ± 13.5<br>Median 75<br>[45.2-95.8]       | 76.5 ± 12.4<br>Median 77.8<br>[43.6-95.6]     | 0.261 | 0.170 | 0.310 | 0.857 |
| Mean wind speed on the first day of stroke [km/h]           | 9.8 ± 4.9<br>Median 8.2<br>[1.8-24.1]         | 8.8 ± 4.7<br>Median 7.4<br>[1.8-22.2]         | 8.7 ± 3.9<br>Median 8.1<br>[1.8-19.8]         | 0.111 | 0.412 | 0.683 | 0.461 |

NIHSS- National Institute of Health Stroke Scale

**Table S2.** Selected meteorological parameters on the day of stroke onset and types of stroke.

| Parameter                | Hemorrhagic stroke<br>N=38                     | Ischaemic stroke<br>N=364                        | p     |
|--------------------------|------------------------------------------------|--------------------------------------------------|-------|
| Maximum temperature [°C] | 14.2 ± 9.3<br>Median 13.25<br>Range [1.4-32.7] | 13.7 ± 9.4<br>Median 12.6<br>Range [(-3.9)-34.7] | 0.748 |

|                                                        |                                                     |                                                     |       |
|--------------------------------------------------------|-----------------------------------------------------|-----------------------------------------------------|-------|
| Minimum temperature [°C]                               | 4.3 ± 6.4<br>Median 3.5<br>Range [(-7.2)–17.7]      | 4.1 ± 6.9<br>Median 2.7<br>Range [(-11.4)–21.0]     | 0.867 |
| Mean temperature [°C]                                  | 9.1 ± 7.7<br>Median 7.3<br>Range [(-2.1)–23.3]      | 8.9 ± 7.9<br>Median 7.4<br>Range [(-7.2)–27]        | 0.836 |
| Mean temperature on the day preceding stroke [°C]      | 9.2 ± 7.3<br>Median 6.7<br>Range [(-2.2)–23.3]      | 9.0 ± 7.7<br>Median 7.8<br>Range [(-7.2)–27]        | 0.945 |
| Mean monthly temperature [°C]                          | 9.4 ± 7.1<br>Median 7.6<br>Range [0.6–21.8]         | 9.0 ± 7.0<br>Median 7.6<br>Range [0.6–21.8]         | 0.618 |
| Humidity [%]                                           | 77.0 ± 12.0<br>Median 79.15<br>Range [47.1–95.8]    | 73.7 ± 13.3<br>Median 74.4<br>Range [43.2–96.4]     | 0.140 |
| Atmospheric pressure [hPa]                             | 985.4 ± 8.6<br>Median 986.4<br>Range [946.9–997.9]  | 985.0 ± 8.5<br>Median 985.1<br>Range [946.9–1004.7] | 0.794 |
| Atmospheric pressure on the day preceding stroke [hPa] | 984.6 ± 7.0<br>Median 983.9<br>Range [968.2–1001.8] | 985.2 ± 7.8<br>Median 985.0<br>Range [958.4–1004.7] | 0.637 |
| Atmospheric pressure, monthly mean [hPa]               | 985.0 ± 3.1<br>Median 984.2<br>Range [981.4–994.2]  | 985.2 ± 3.4<br>Median 984.2<br>Range [981.4–994.2]  | 0.824 |
| Wind speed [km/h]                                      | 8.24 ± 3.90<br>Median 7.3<br>Range [2.9–20.6]       | 9.55 ± 4.87<br>Median 8.1<br>Range [1.8–24.1]       | 0.109 |
| Precipitation [mm]                                     | 1.22 ± 2.43<br>Median 0.2<br>Range [0–12]           | 1.53 ± 2.96<br>Median 0<br>Range [0–20.1]           | 0.540 |
| Insolation [h]                                         | 4.78 ± 4.75<br>Median 3.95<br>Range [0–14.4]        | 4.54 ± 4.38<br>Median 3.3<br>Range [0–14.7]         | 0.683 |
